# Supplementary material
Source: Springer Nature journal article supplement (https://www.springermedizin.de/resource/supplementary/13002_2013_356_MOESM4_ESM.docx/9627710)
Supplement: MOESM4 [file 9627710]

**Table 2. Edible agricultural weeds reported by the people of Shurugwi District, Zimbabwe. Species marked with asterisk (*) are exotic**

| **Family/species/voucher number** | **Vernacular name#** | **Part used** | **Availability** | **No. of citations (%)** |
| --- | --- | --- | --- | --- |
| **Amaranthaceae** | | | | |
| *Amaranthus hybridus* L.; AM543 | Mbuya (S); pigweed (E) | Leaves cooked as vegetable | Rainy/harvest season | 39.5 |
| **A. spinosus* L.; AM123 | Mbuya (S); thorny pigweed (E) | Leaves cooked as vegetable | Rainy/harvest season | 8.8 |
| *A. thunbergii* Moq.; AM321 | Mbuya (S); poor man’s spinach (E) | Leaves cooked as vegetable | Rainy/harvest season | 12.2 |
| *Celosia trigyna* L.; AM289 | Mundawarara (S); silver spinach (E) | Leaves cooked as vegetable | Rainy/harvest season | 16.3 |
| **Asteraceae** | | | | |
| **Bidens pilosa* L.; AM490 | Black jack (E); sine (S) | Leaves cooked as vegetable | Rainy/harvest season | 6.1 |
| **Galinsoga parviflora* Cav.; AM604 | Chickweed (E) | Young leaves and shoots cooked as vegetable | Rainy/harvest season | 7.5 |
| **Sonchus oleraceus* L.; AM111 | Rurimirwemombe (S); snow thistle (E); | Leaves cooked as vegetable | Rainy/harvest season | 2.7 |
| **Capparaceae** | | | | |
| *Cleome gynandra* L.; AM308 | Nyovhi (S); spider flower (E) | Leaves and young shoots cooked as leafy vegetable. Leaves and shoots sun dried for later consumption | Rainy/harvest/dry season | 93.9 |
| *C. monophylla* L.; AM434 | Musemwasemwa (S); spindle pod (E); | Leaves cooked as vegetable | Rainy/harvest season | 25.9 |
| **Chenopodiaceae** | | | | |
| **Chenopodium album* L.; AM322 | Fat hen (E); mubvunzandadya (S) | Leaves cooked as vegetable | Rainy/harvest season | 23.8 |
| **Cucurbitaceae** | | | | |
| **Cucumis anguria* L.; AM449 | Muchacha (S); wild gherkin (E) | Leaves and young shoots cooked as leafy vegetable. Leaves and young shoots sun dried for later consumption | Rainy/harvest/dry season | 87.8 |
| *C. metuliferus* Naudin AM612 | Mugaka (S); spiny cucumber (E) | Edible fruit pulp. Ripe fruit stored for later use | Rainy/harvest/dry season | 90.5 |
| **Cyperaceae** | | | | |
| *Cyperus esculentus* L.; AM361 | Pfende (S) | Corm (excluding peel) edible | Rainy/harvest season | 10.2 |
| **Malvaceae** | | | | |
| *Hibiscus articulatus* Hochst. ex A. Rich.; AM122 | Derere hambakachere (S); wild hibiscus (E) | Leaves cooked as vegetable | Rainy/harvest season | 11.6 |
| **Moringaceae** | | | | |
| **Moringa oleifera* Lour.; AM309 | Drumstick tree (E); moringa (S) | Leaves, flowers, fruits and seeds cooked as vegetable | Rainy/harvest/dry season | 8.2 |
| **Oxalidaceae** | | | | |
| **Oxalis latifolia* Kunth; AM328 | Musauti (S) | Corm (excluding peel) edible | Rainy/harvest season | 9.5 |
| **Solanaceae** | | | | |
| **Physalis angulata* L.; AM365 | Muguzubheri | Fruit eaten raw | Rainy/harvest season | 10.9 |
| **Solanum nigrum* L.; AM381 | Black nightshade (E); Musungusungu (S) | Leaves, young shoots cooked as vegetable, ripe fruit edible | Rainy/harvest season | 13.6 |
| **Tiliaceae** | | | | |
| *Corchorus asplenifolius* Burch.; AM392 | Derere (S); Jute (E) | Leaves and young shoots cooked as vegetable | Rainy/harvest season | 6.8 |
| *C. olitorius* L.; AM118 | Derere (S); Jute (E) | Leaves and young shoots cooked as vegetable | Rainy/harvest season | 4.8 |
| *C. tridens* L.; AM528 | Derere (S); Wild jute (E) | Leaves and young shoots cooked as vegetable. Leaves and young shoots sun dried for later consumption | Rainy/harvest/dry season | 50.3 |

#Abbreviations: E = English; S = Shona
